# Supplementary material for: p38 MAPK regulates the Wnt inhibitor Dickkopf-1 in osteotropic prostate cancer cells
Source: PubMed Central journal article supplement (PMC4849158; doi:10.1038/cddis.2016.32), 2016-02-25

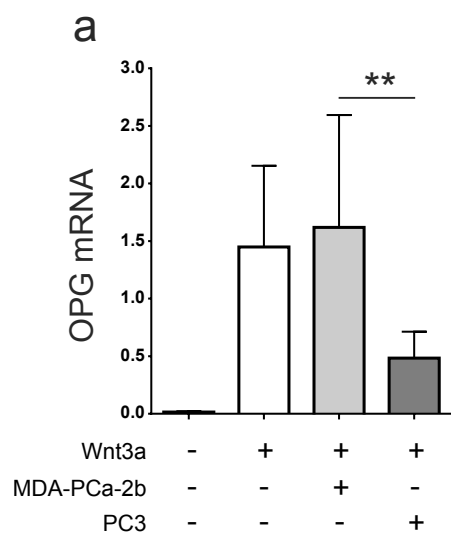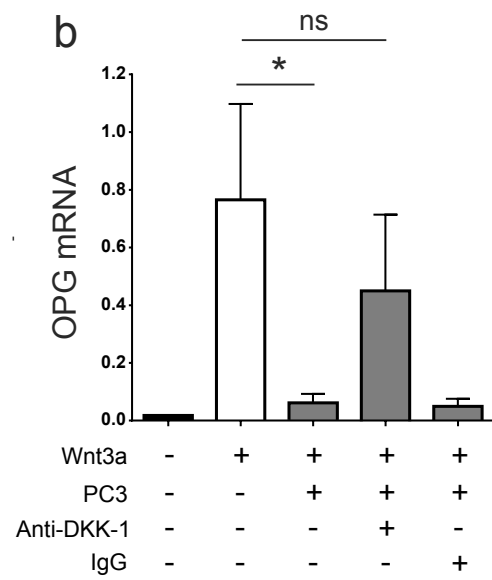

Supplement: cddis201632x1.pdf [file cddis201632x1.pdf]
